# Supplementary material for: GATA-4, a potential novel therapeutic target for high-grade meningioma, regulates miR-497, a potential novel circulating biomarker for high-grade meningioma
Source: PubMed Central journal article supplement — eBioMedicine. 2020 Aug 15;59:102941. doi: 10.1016/j.ebiom.2020.102941 (PMC7452696; doi:10.1016/j.ebiom.2020.102941), 2020-08-15

# Material Safety Data Sheet

AGN2019-14171

## Product and Company Identification

**Product Name:**2-(1,3-benzodioxol-5-ylmethyl)butanedioic acid

**Company:**Angene International Limited

**Address:**4/F, Silvercord Centre Tower One

30 Canton Road, Tsim Sha Tsui

Kowloon, Hong Kong

**Tel:**+852 8191 6999

**Email:**contact@an-gene.com

## Product Information

**Synonyms:**2-(1,3-benzodioxol-5-ylmethyl)butanedioic acid

**CAS No:**57420-27-6

**Molecular Formula:**C<sub>12</sub>H<sub>12</sub>O<sub>6</sub>

**Molecular Weight:**252.22g/mol

**Date:**May 31, 2019

## Hazards Summarizing

### Emergency Overview

No known OSHA hazards

Not a dangerous substance according to GHS.

### Potential Health Effects

**Inhalation** May be harmful if inhaled. May cause respiratory tract irritation.

**Skin** May be harmful if absorbed through skin. May cause skin irritation.

**Eyes** May cause eye irritation.

**Ingestion** May be harmful if swallowed.

### First Aid Measures

#### If inhaled

If breathed in, move person into fresh air. If not breathing give artificial respiration.

#### In case of skin contact

Wash off with soap and plenty of water.

#### In case of eye contact

Flush eyes with water as a precaution.

#### If swallowed

Never give anything by mouth to an unconscious person. Rinse mouth with water.

### Accidental Release Measures

#### Suitable extinguishing media

Use water spray, alcohol-resistant foam, dry chemical or carbon dioxide.

#### Special protective equipment for fire-fighters

Wear self contained breathing apparatus for fire fighting if necessary.

### Accidental Release Measures

#### Personal precautions

Avoid formation

#### Environmental precautions

Do not let product enter drains.

#### Methods and materials for containment and cleaning up

Sweep up and shovel. Keep in suitable, closed containers for disposal.

### Handling and Storage

#### Handling

Provide appropriate exhaust ventilation at places where is formed. Normal measures for preventive fire protection.

#### Storage

Store in cool place. Keep container tightly closed in a dry and well-ventilated place.

### Exposure Controls / Personal Protections

#### Personal protective equipment

##### Respiratory protection

Where protection from nuisance levels of s are desired, use type N95 (US) or type P1 (EN 143) masks. Use respirators and components tested and approved under appropriate government standards such as NIOSH (US) or CEN (EU).

#### Hand protection

For prolonged or repeated contact use protective gloves.

**Eye protection**

Safety glasses.

**Hygiene measures**

General industrial hygiene practice.

**Physical Chemical Properties**

**Appearance**

White powder

**Safety data**

Melting point no data available

Boiling point 475.3°C at 760mmHg

Flash point 201.3°C

Ignition temperature no data available

**Stability and Reactivity**

**Storage stability**

Stable under recommended storage conditions.

Hazardous decomposition products

Hazardous decomposition products formed under fire conditions.-Carbon oxides, Sodium oxides.

Other decomposition products-no data available.

**Toxicological Information**

**Acute toxicity**

Oral Rat

>11,500mg/kg LD50

**Irritation and corrosion**

no data available

**Potential Health Effects**

**Inhalation** May be harmful if inhaled. May cause respiratory tract irritation.

**Skin** May be harmful if absorbed through skin. May cause skin irritation.

**Eyes** May cause eye irritation.

**Ingestion** May be harmful if swallowed.

**Ecological Information**

**Elimination information (persistence and degradability)**

no data available

**Ecotoxicity effects**

no data available

**Further information on ecology**

no data available

**Disposal Considerations**

**Product**

Observe all federal, state, and local environmental regulations.

**Contaminated packaging**

Dispose of as unused product.

**Transport Information**

**ADR/RID**

Not dangerous goods

**IMDG**

Not dangerous goods.

**IATA**

Not dangerous goods.

**Regulatory Information**

no data available.

**Other Information**

The information contained in this MSDS is believed to be correct to the best of our knowledge, but it does not purport to be all-inclusive and shall be used only as a guide. Angene International Limited shall not be held liable for any loss, injury, or damage resulting from handling or from contact with the above product; since conditions of usage are beyond our control. All risks of use are assumed by end-users.

**End of MSDS**

## Angene International Limited

Angene International Limited  
 RM G G/F TAK FUNG INDUSTRIAL  
 CENTER TOWER 1,168 TEXACO RD  
 TSUEN WAN,HK  
 Tel: +852 81777290  
 Email: sales@angenechemical.com

## Certificate of Analysis

|                          |                                                                                     |                           |                                                |
|--------------------------|-------------------------------------------------------------------------------------|---------------------------|------------------------------------------------|
| <b>Batch No.:</b>        | G02-14171-1                                                                         | <b>Molecular Formula</b>  | C <sub>12</sub> H <sub>12</sub> O <sub>6</sub> |
| <b>CAS Registry No.:</b> | 57420-27-6                                                                          | <b>Molecular Weight</b>   | 252.22                                         |
| <b>Manufacture Date</b>  | 2019-05-30                                                                          | <b>Net Weight</b>         | 17g                                            |
| <b>Product ID</b>        | AGN-PC-0JP7P5                                                                       | <b>Storage conditions</b> | Cold storage                                   |
| <b>Product Name:</b>     | 2-(1,3-benzodioxol-5-ylmethyl)butanedioic acid                                      |                           |                                                |
| <b>Items</b>             | <b>Specifications</b>                                                               | <b>Results</b>            |                                                |
| Appearance               | White powder                                                                        | Conforms                  |                                                |
| Purity                   | ≥95%                                                                                | Conforms                  |                                                |
| HNMR                     | 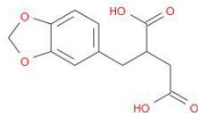 | Conforms                  |                                                |
| <b>Report Date</b>       | 2019-06-04                                                                          |                           |                                                |
| <b>Analyst</b>           | Hui Dou                                                                             |                           |                                                |
| <b>Supervisor</b>        | ChenSun                                                                             |                           |                                                |

**Conclusion:** The above product meets the specifications of Angene

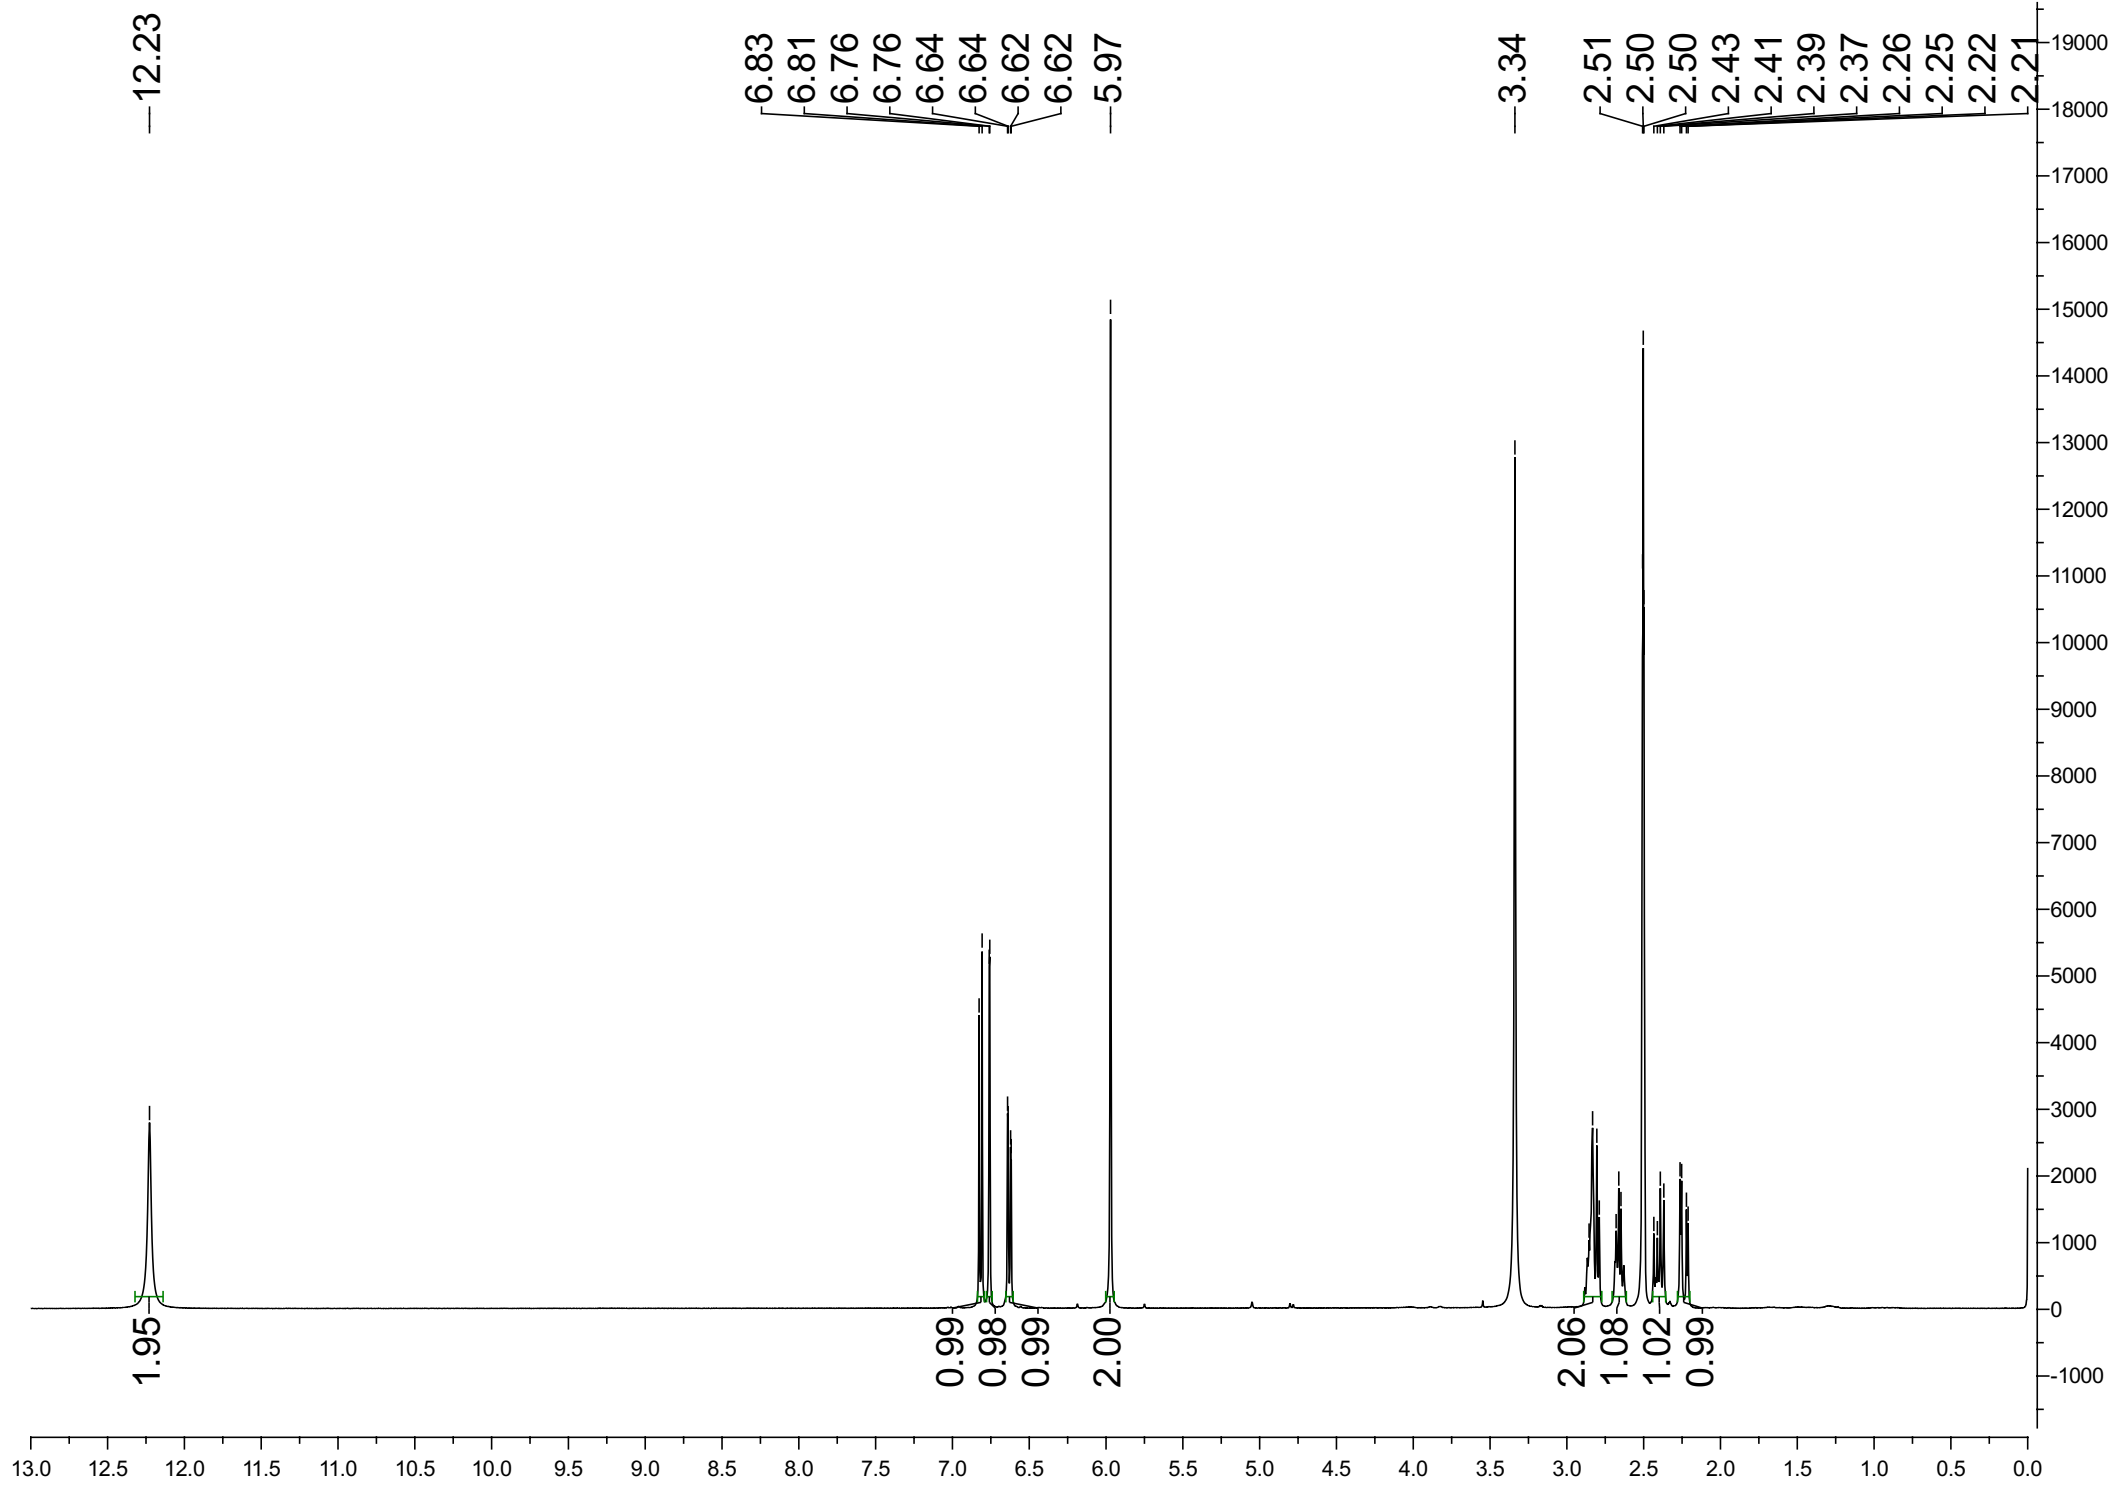

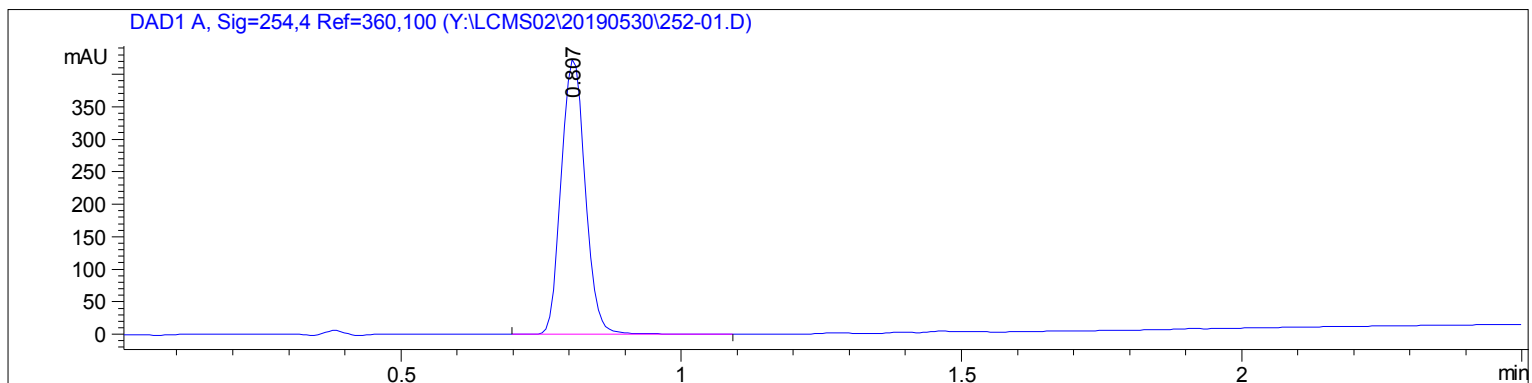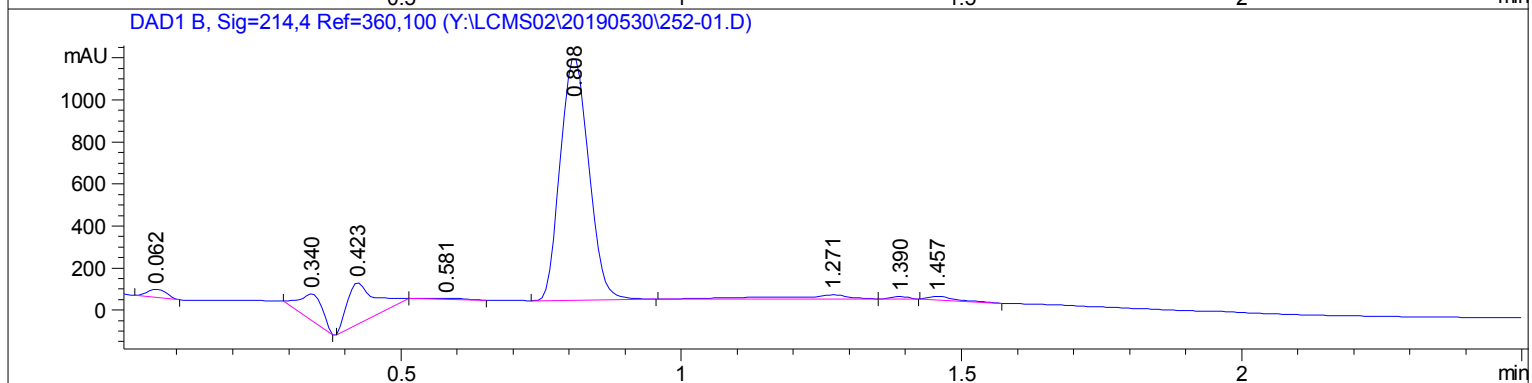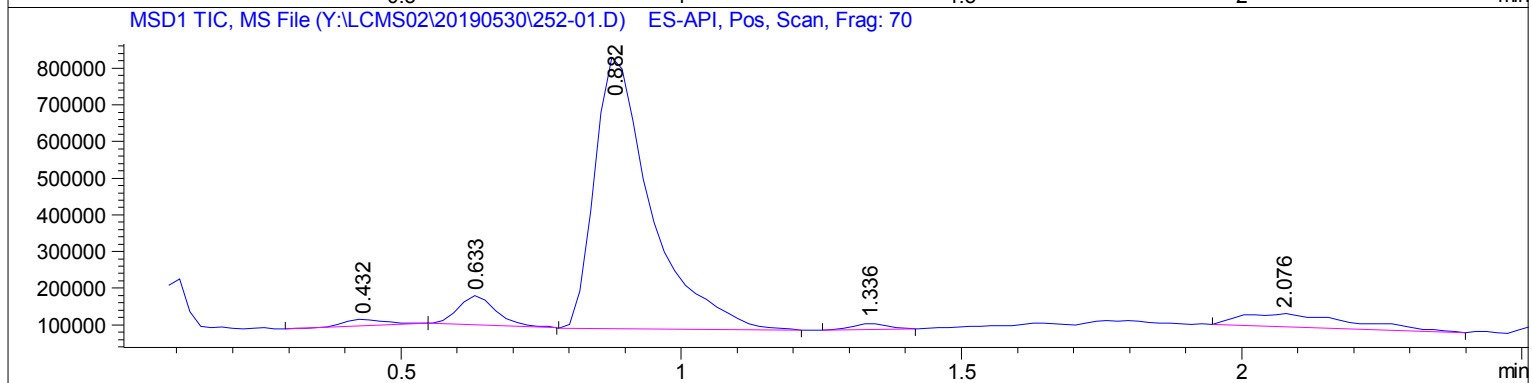

\*\*\* 报告结束 \*\*\*

MS Spectrum

\*MSD1 SPC, time=0.895 of Y:\LCMS02\20190530\252-01.D ES-API, Pos, Scan, Frag: 70

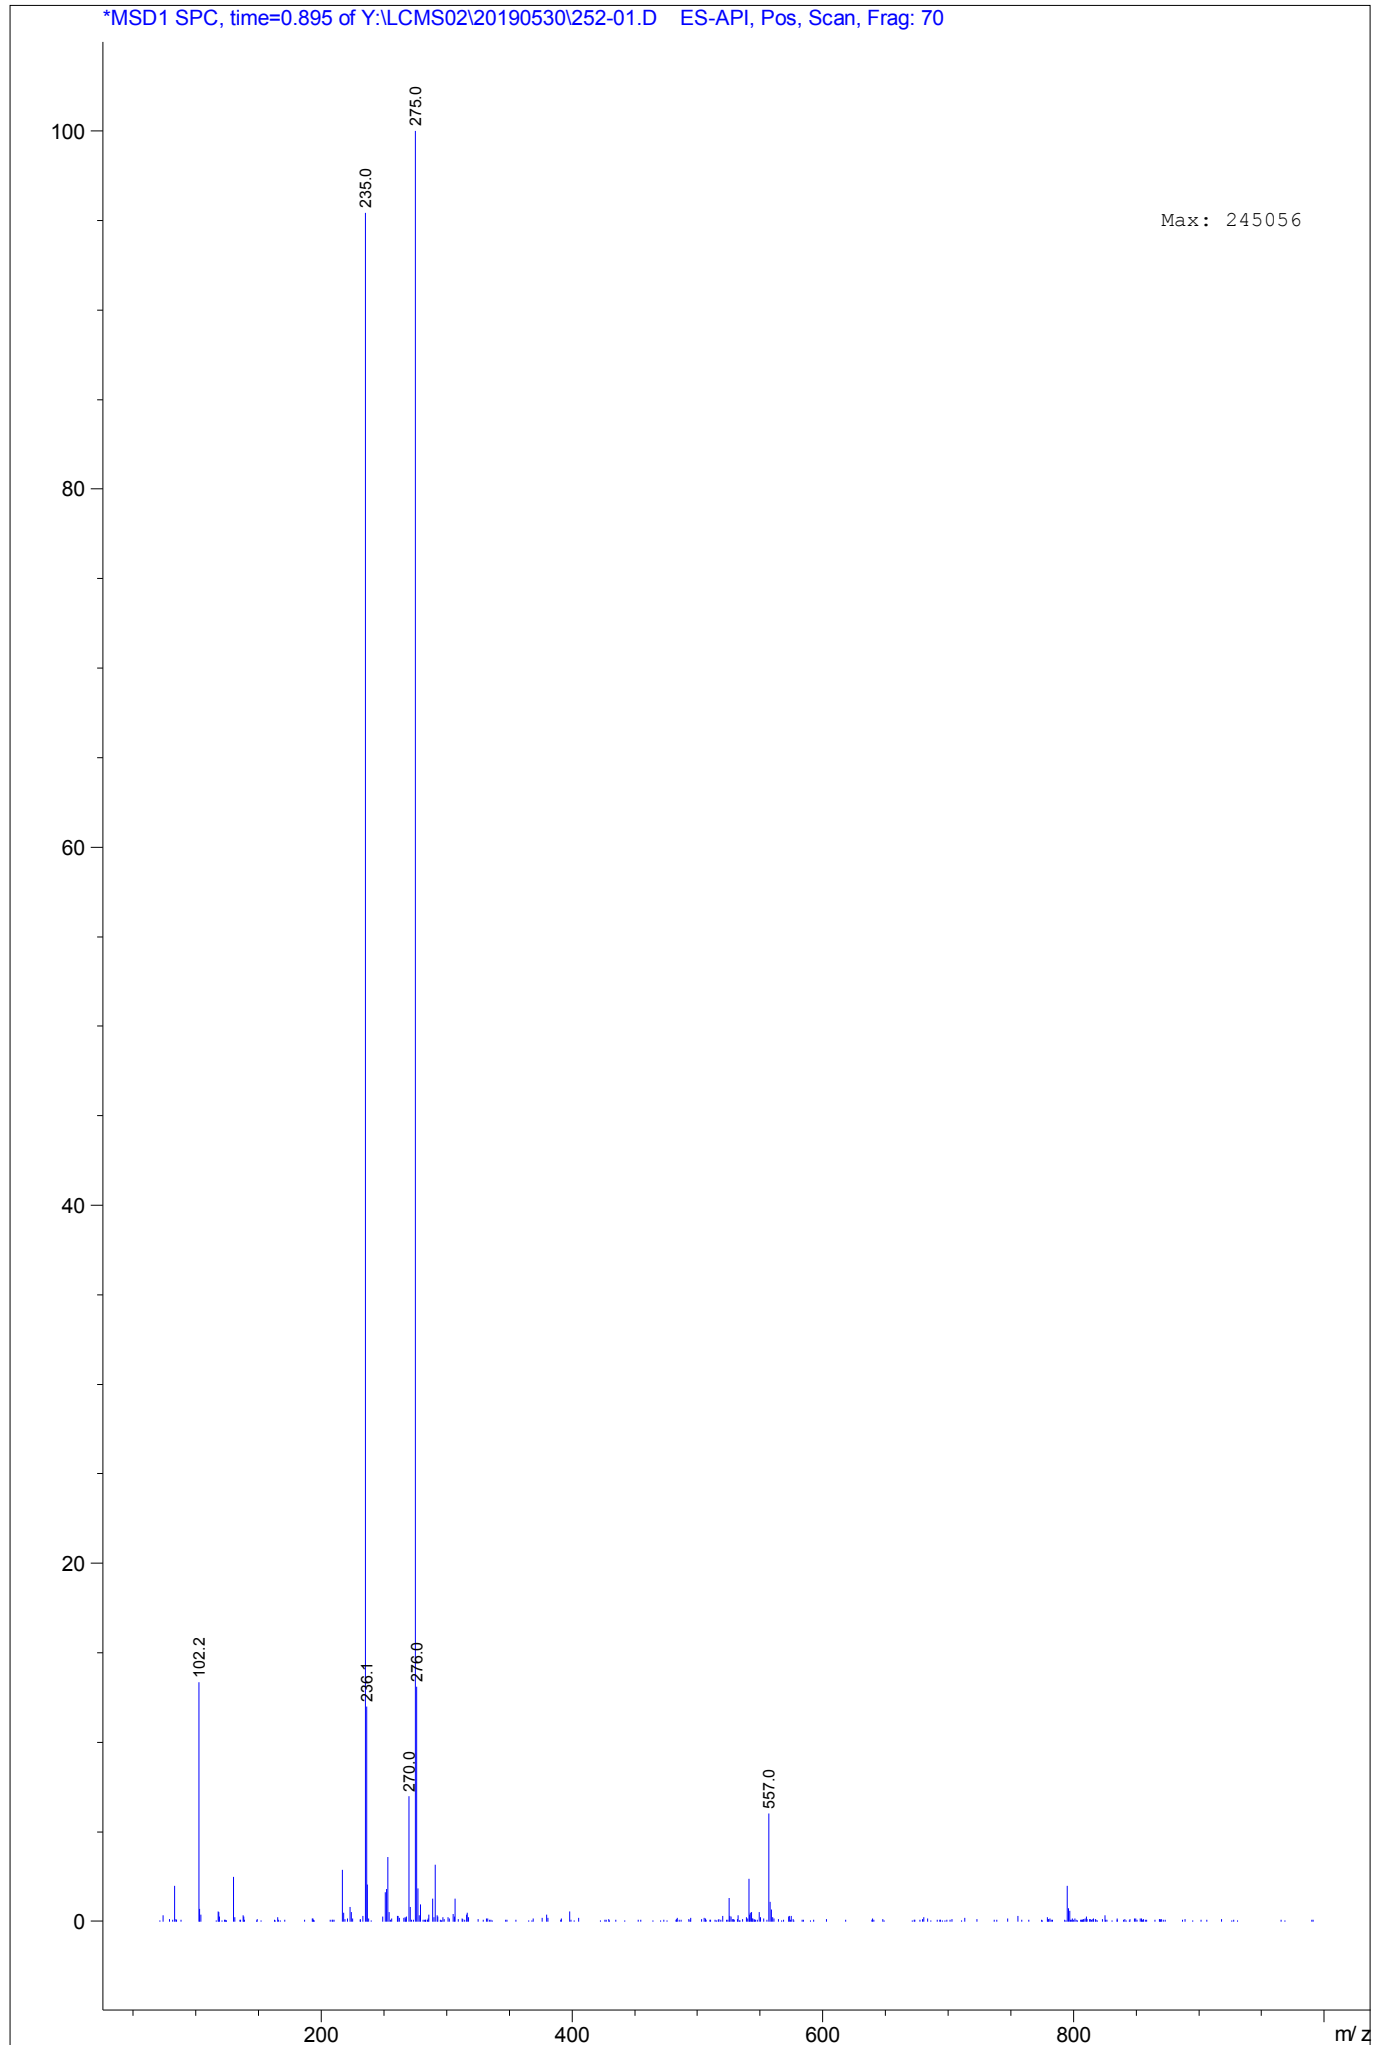

Supplement: mmc1.pdf [file mmc1.pdf]
